# Supplementary material
Source: MDPI journal article supplement (https://www.mdpi.com/2071-1050/12/22/9438)
Supplement: s1 [file s1]

Table S1: Questionnaire

Dear Sir/Madam,

In the following table, please indicated how much you agree or disagree with the proposed statements by choosing one number in each row (1 – totally disagree, 2 – disagree, 3 – I do not know/neutral, 4 – agree, 5 – totally agree).

|                                                                                                                           |   |   |   |   |   |
|---------------------------------------------------------------------------------------------------------------------------|---|---|---|---|---|
| Demand for farm products is increased due to tourism.                                                                     | 1 | 2 | 3 | 4 | 5 |
| The number of jobs for the local residents has increased due to tourism.                                                  | 1 | 2 | 3 | 4 | 5 |
| Incomes of local community are increased due to tourism.                                                                  | 1 | 2 | 3 | 4 | 5 |
| Local products are sold more due to tourism.                                                                              | 1 | 2 | 3 | 4 | 5 |
| Rural economy is diversified due to tourism.                                                                              | 1 | 2 | 3 | 4 | 5 |
| Profitability of local businesses is enhanced due to tourism.                                                             | 1 | 2 | 3 | 4 | 5 |
| Tourism creates opportunities for investments.                                                                            | 1 | 2 | 3 | 4 | 5 |
| Standards of living are improved due to tourism.                                                                          | 1 | 2 | 3 | 4 | 5 |
| Respect for local culture is enhanced due to tourism.                                                                     | 1 | 2 | 3 | 4 | 5 |
| Opportunities to participate in local activities are increased due to tourism.                                            | 1 | 2 | 3 | 4 | 5 |
| The sense of belonging to the local community is stronger due to tourism                                                  | 1 | 2 | 3 | 4 | 5 |
| Number of learning opportunities is increased due to tourism.                                                             | 1 | 2 | 3 | 4 | 5 |
| Contact among local residents and tourists can boost awareness that tourism development is significant for the community. | 1 | 2 | 3 | 4 | 5 |
| Tourism encourages the protection of the natural environment.                                                             | 1 | 2 | 3 | 4 | 5 |
| More areas have been declared as protected due to tourism.                                                                | 1 | 2 | 3 | 4 | 5 |
| Tourism affects the increase in local real estate value.                                                                  | 1 | 2 | 3 | 4 | 5 |
| Amount of investments in tourism infrastructure increases due to tourism.                                                 | 1 | 2 | 3 | 4 | 5 |
| Amount of investments in local infrastructure increases due to tourism.                                                   | 1 | 2 | 3 | 4 | 5 |
| The settings and facilities in community are excellent.                                                                   | 1 | 2 | 3 | 4 | 5 |
| I favor living in my community over other communities.                                                                    | 1 | 2 | 3 | 4 | 5 |
| I like living in this community.                                                                                          | 1 | 2 | 3 | 4 | 5 |
| Living in my community reflects who I am.                                                                                 | 1 | 2 | 3 | 4 | 5 |
| It means a lot to me to live in this community.                                                                           | 1 | 2 | 3 | 4 | 5 |
| I am very attached to the place where I live.                                                                             | 1 | 2 | 3 | 4 | 5 |
| I feel I belong to my community.                                                                                          | 1 | 2 | 3 | 4 | 5 |
| People I know favor our community over others.                                                                            | 1 | 2 | 3 | 4 | 5 |
| Local residents identify their lives with living in a particular community.                                               | 1 | 2 | 3 | 4 | 5 |
| I am satisfied with the conditions of my life.                                                                            | 1 | 2 | 3 | 4 | 5 |
| I have all things I wanted in my life.                                                                                    | 1 | 2 | 3 | 4 | 5 |
| In general, I am satisfied with my life.                                                                                  | 1 | 2 | 3 | 4 | 5 |
| I am happy to support the development of tourism initiatives that are sustainable for my community.                       | 1 | 2 | 3 | 4 | 5 |
| I am willing to take active participation in creation of plans and strategies connected with tourism.                     | 1 | 2 | 3 | 4 | 5 |
| I am willing to take active part in cultural exchanges with visitors.                                                     | 1 | 2 | 3 | 4 | 5 |
| I am willing to take part in promoting environmental education                                                            | 1 | 2 | 3 | 4 | 5 |

|                                                                                           |   |   |   |   |   |
|-------------------------------------------------------------------------------------------|---|---|---|---|---|
| and conservation initiatives.                                                             |   |   |   |   |   |
| I would support further tourism development in my community.                              | 1 | 2 | 3 | 4 | 5 |
| I believe that tourism development will positively affect quality of all residents' life. | 1 | 2 | 3 | 4 | 5 |

In the following table, please indicate which demographic information relates to you:

| <b>Gender</b> | <b>Age</b>                  | <b>Education</b>               |
|---------------|-----------------------------|--------------------------------|
| Male          | Less than 25                | Primary school                 |
| Female        | 26-46                       | Secondary school               |
|               | 47-67                       | Faculty                        |
|               | Over 67                     |                                |
| <b>Status</b> | <b>Income per month (€)</b> | <b>Living in a village for</b> |
| Student       | Less than 200               | Less than 10 years             |
| Unemployed    | 200-400                     | 10-20                          |
| Employed      | 401-600                     | 21-30                          |
| Retired       | More than 600               | Over 30 years                  |
